# Supplementary material for: Elucidation of the catalytic mechanism of 6-hydroxymethyl-7,8-dihydropterin pyrophosphokinase using QM/MM calculations
Source: Royal Society of Chemistry journal article supplement (doi:10.1039/c8ob01428k), 2018-01-01

**Supporting Information**

**Elucidation of the Catalytic Mechanism of 6-Hydroxymethyl-7,8-dihydropterin pyrophosphokinase using QM/MM Calculations**

*Nathjanan Jongkon<sup>1</sup>, Duangkamol Gleeson<sup>2</sup> M. Paul Gleeson<sup>3\*</sup>*

<sup>1</sup>Department of Social and Applied Science, College of Industrial Technology, King Mongkut's University of Technology North Bangkok, Bangkok 10800, Thailand

<sup>2</sup>Department of Chemistry, Faculty of Science, King Mongkut's Institute of Technology Ladkrabang, Thailand

<sup>3</sup> Department of Biomedical Engineering, Faculty of Engineering, King Mongkut's Institute of Technology Ladkrabang, Bangkok 10520, Thailand

**Table S1** Mulliken charge distribution of HPPK on WT-Arg92<sup>0</sup> (Arg) pathway.

| <b>ID</b> | <b>REACT</b> | <b>TS1</b> | <b>INT1</b> | <b>TS2</b> | <b>PROD</b> |
|-----------|--------------|------------|-------------|------------|-------------|
| PRO43     | 0.05         | 0.05       | 0.05        | 0.05       | 0.05        |
| PRO44     | 0.01         | 0.01       | 0.00        | 0.01       | 0.01        |
| LEU45     | -0.07        | -0.07      | -0.07       | -0.07      | -0.07       |
| ARG88     | 0.81         | 0.81       | 0.80        | 0.80       | 0.79        |
| ARG92     | -0.06        | 0.63       | 0.76        | 0.71       | 0.70        |
| ASP95     | -0.46        | -0.46      | -0.48       | -0.48      | -0.48       |
| ASP97     | -0.45        | -0.47      | -0.47       | -0.46      | -0.46       |
| HIP115    | 0.88         | 0.86       | 0.88        | 0.92       | 0.92        |
| ARG121    | 0.88         | 0.89       | 0.88        | 0.86       | 0.86        |
| Mg:water  | 1.65         | 1.06       | 1.58        | 1.67       | 1.66        |
| ATP       | -2.48        | -2.48      | -2.48       | -1.29      | -1.34       |
| HP        | 0.23         | 0.18       | -0.43       | -1.71      | -1.65       |

**Table S2.** Mulliken charge distribution of HPPK on R82A-Arg92<sup>0</sup> (Arg) pathway.

| <b>ID</b> | <b>REACT</b> | <b>TS1</b> | <b>INT1</b> | <b>TS2</b> | <b>PROD</b> |
|-----------|--------------|------------|-------------|------------|-------------|
| PRO43     | 0.05         | 0.05       | 0.05        | 0.05       | 0.05        |
| PRO44     | 0.01         | 0.00       | 0.00        | 0.00       | 0.00        |
| LEU45     | -0.07        | -0.07      | -0.07       | -0.07      | -0.07       |
| ARG88     | 0.80         | 0.79       | 0.80        | 0.79       | 0.77        |
| ARG92     | -0.03        | 0.72       | 0.70        | 0.72       | 0.70        |
| ASP95     | -0.46        | -0.46      | -0.47       | -0.48      | -0.47       |
| ASP97     | -0.47        | -0.48      | -0.48       | -0.47      | -0.47       |
| HIP115    | 0.85         | 0.86       | 0.84        | 0.91       | 0.92        |
| ARG121    | 0.87         | 0.86       | 0.87        | 0.84       | 0.84        |
| Mg:water  | 1.61         | 1.17       | 1.66        | 1.69       | 1.69        |
| ATP       | -2.45        | -2.47      | -2.45       | -1.29      | -1.32       |
| HP        | 0.28         | 0.03       | -0.45       | -1.69      | -1.66       |

**Table S3.** Mulliken charge distribution of HPPK on WT-Arg92<sup>+</sup> pathway.

| ID       | WT-R92 <sup>+</sup> (Asp) |       |       | WT-R92 <sup>+</sup> (PPi) |       |       |
|----------|---------------------------|-------|-------|---------------------------|-------|-------|
|          | REACT                     | TS    | PROD  | REACT                     | TS    | PROD  |
| PRO43    | 0.05                      | 0.05  | 0.05  | 0.05                      | 0.05  | 0.05  |
| PRO44    | 0.04                      | 0.03  | 0.03  | 0.03                      | 0.04  | 0.03  |
| LEU45    | -0.08                     | -0.08 | -0.08 | -0.08                     | -0.08 | -0.08 |
| ARG88    | 0.82                      | 0.81  | 0.80  | 0.81                      | 0.81  | 0.81  |
| ARG92    | 0.72                      | 0.75  | 0.72  | 0.77                      | 0.77  | 0.77  |
| ASP95    | -0.46                     | 0.14  | 0.16  | -0.46                     | -0.46 | -0.46 |
| ASP97    | -0.45                     | -0.46 | -0.46 | -0.45                     | -0.45 | -0.45 |
| HIP115   | 0.87                      | 0.92  | 0.93  | 0.94                      | 0.94  | 0.94  |
| ARG121   | 0.91                      | 0.89  | 0.88  | 0.89                      | 0.88  | 0.89  |
| Mg:water | 1.82                      | 1.83  | 1.83  | 1.83                      | 2.42  | 1.83  |
| ATP      | -2.45                     | -2.52 | -1.30 | -2.65                     | -1.32 | -1.31 |
| HP       | 0.22                      | -0.35 | -1.56 | 0.32                      | -1.59 | -1.02 |

**Table S4.** Mulliken charge distribution of HPPK on R92A-Arg92<sup>0</sup> (Asp) pathway.

| R92A     | REACT | TS    | PROD  |
|----------|-------|-------|-------|
| PRO43    | 0.05  | 0.05  | 0.05  |
| PRO44    | 0.01  | 0.01  | 0.01  |
| LEU45    | -0.07 | -0.08 | -0.08 |
| ARG88    | 0.80  | 0.83  | 0.83  |
| ASP95    | -0.47 | 0.15  | 0.16  |
| ASP97    | -0.47 | -0.47 | -0.47 |
| HIP115   | 0.86  | 0.90  | 0.90  |
| ARG121   | 0.90  | 0.86  | 0.86  |
| Mg:water | 1.67  | 1.66  | 1.66  |
| ATP      | -2.51 | -1.31 | -1.35 |
| HP       | 0.23  | -1.60 | -1.57 |

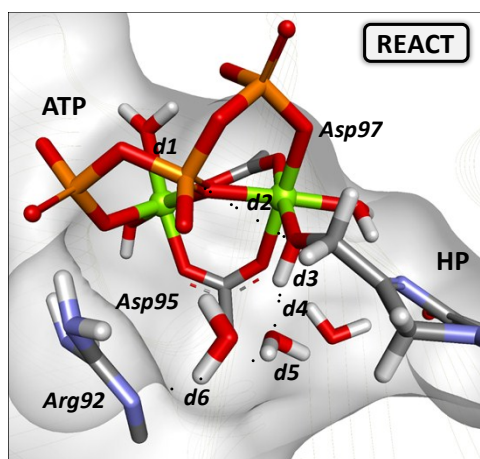

**Table S5.** The key distances involving WT-Arg92<sup>0</sup> (Arg) simulation obtained at the QMMM (M062X/6-31G\*) level of theory (in Angstrom).

| WT-Arg92 <sup>0</sup> Arg | d1   | d2   | d3   | d4   | d5   | d6   |
|---------------------------|------|------|------|------|------|------|
| REACT                     | 1.63 | 3.06 | 1.02 | 1.48 | 0.98 | 3.30 |
| TS1                       | 1.63 | 3.32 | 1.12 | 1.36 | 1.56 | 1.08 |
| INT1                      | 1.65 | 3.04 | 1.64 | 1.00 | 3.08 | 1.02 |
| TS2                       | 2.21 | 1.81 | 1.99 | 0.97 | 3.04 | 1.02 |
| PROD                      | 2.85 | 1.71 | 2.24 | 0.97 | 2.99 | 1.02 |

**Table S6.** The key distances involving R82A-Arg92<sup>0</sup> (Arg) simulation obtained at the QMMM (M062X/6-31G\*) level of theory (in Angstrom).

| R82A-Arg92 <sup>0</sup> Arg | d1   | d2   | d3   | d4   | d5   | d6   |
|-----------------------------|------|------|------|------|------|------|
| REACT                       | 1.61 | 3.26 | 0.98 | 2.03 | 1.02 | 1.67 |
| TS1                         | 1.62 | 3.29 | 1.07 | 1.48 | 1.53 | 1.10 |
| INT1                        | 1.63 | 3.18 | 1.84 | 0.99 | 1.96 | 1.02 |
| TS2                         | 2.30 | 1.78 | 2.19 | 0.97 | 2.97 | 1.02 |
| PROD                        | 2.77 | 1.71 | 2.27 | 0.97 | 3.07 | 1.01 |

**Table S7.** HPPK reaction energies (kcal/mol) with Asp95 or PP acting as the general base. The fully-optimized calculations obtained at the QMMM (M062X/6-31G\*) and the SP calculations obtained at the QMMM (M062X/6-31+G\*\*)

| Model | ID    | WT-R92+             |                        | R92A                |                        |
|-------|-------|---------------------|------------------------|---------------------|------------------------|
|       |       | QM/MM<br>$\Delta E$ | QM/MM<br>$\Delta E$ SP | QM/MM<br>$\Delta E$ | QM/MM<br>$\Delta E$ SP |
| Asp95 | REACT | 0.0                 | 0.0                    | 0.0                 | 0.0                    |
|       | TS    | 60.2                | 53.8                   | 48.0                | 51.3                   |
|       | PROD  | 47.3                | 45.3                   | 47.6                | 49.9                   |
| PP    | REACT | -1.4                | -0.4                   | -                   | -                      |
|       | TS    | 47.3                | 46.3                   | -                   | -                      |
|       | PROD  | 46.0                | 45.3                   | -                   | -                      |

**Table S8.** HPPK reaction energies (kcal/mol) with Arg92 acting as the general base. The fully-optimized calculations obtained at the QMMM (M062X/6-31G\*) and the SP calculations obtained at the QMMM (M062X/6-31+G\*\*)

| ID    | WT-Arg92 <sup>0</sup> (Arg) |                     |                        | R82A-Arg92 <sup>0</sup> (Arg) |                        |
|-------|-----------------------------|---------------------|------------------------|-------------------------------|------------------------|
|       | QM<br>$\Delta E$            | QM/MM<br>$\Delta E$ | QM/MM<br>$\Delta E$ SP | QM/MM<br>$\Delta E$           | QM/MM<br>$\Delta E$ SP |
| REACT | 0.0                         | 0.0                 | 0.0                    | 0.0                           | 0.0                    |
| TS1   | 3.5                         | 8.1                 | 8.1                    | 4.2                           | 6.9                    |
| INT   | 0.4                         | 0.4                 | 2.3                    | -4.2                          | 2.1                    |
| TS2   | 12.0                        | 11.7                | 14.7                   | 14.7                          | 20.4                   |
| PROD  | 3.1                         | 7.6                 | 9.4                    | 12.4                          | 17.3                   |

**Figure S1** Correlation observed between the QMMM M062X/6-31G\* and QMMM (M062X/6-31+G\*\* single point energies obtained for all structures.

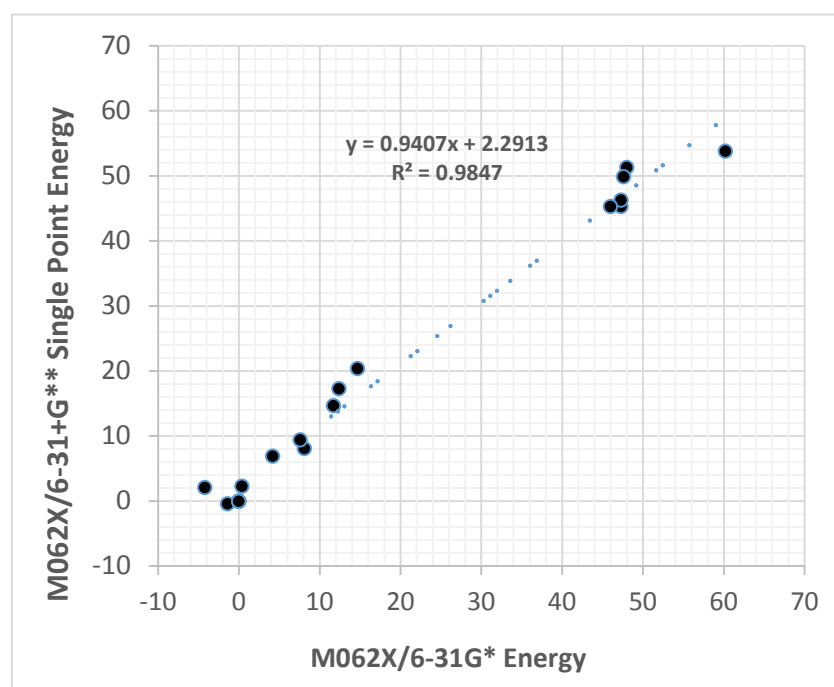

**Figure S2** Superimposition of HPPK with bound substrates in a reactant-like (1Q0N) and product-like (1RAO) configuration. Also shown for the purpose of comparison is the product-like configuration obtained with the 1Q0N-based QM/MM model. Both protein and active site configurations show a high degree of structural similarity confirming the suitability of the model to describe the catalytic reaction taking place.

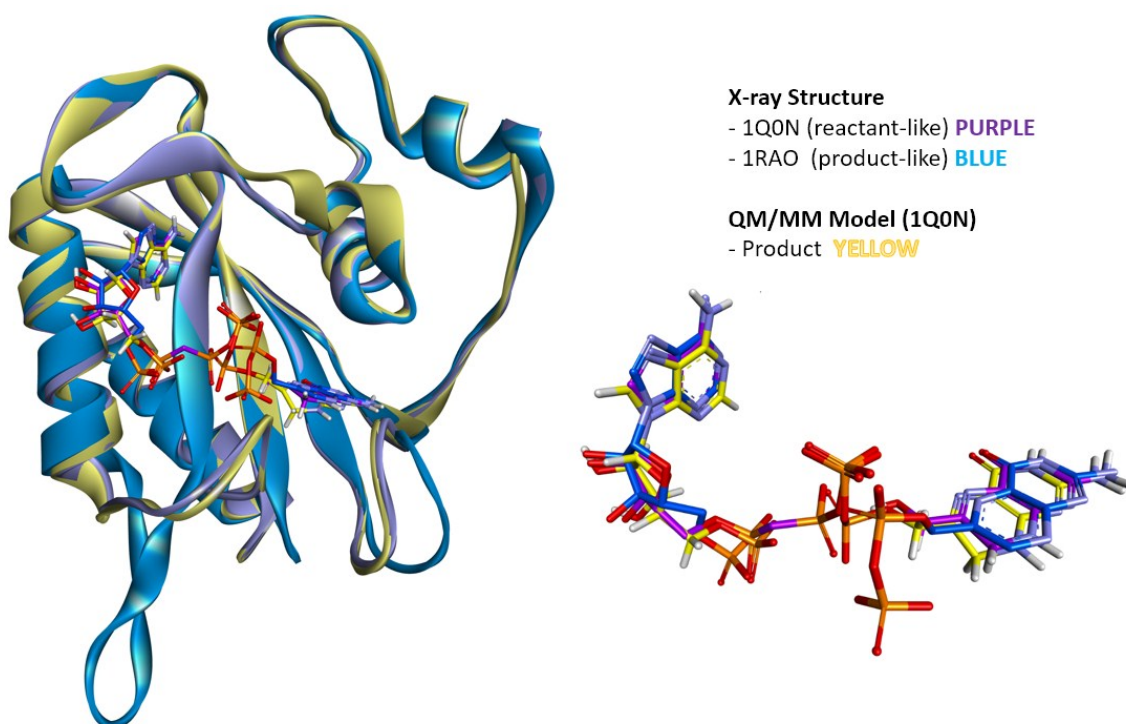

Supplement: c8ob01428k1.pdf [file c8ob01428k1.pdf]
